# Supplementary material for: Urolithin A Restores Mitochondrial Function and Reverses Cardiac Remodeling in HFpEF
Source: Research Square preprint supplement (doi:10.21203/rs.3.rs-8585859/v1), 2026-02-05
Supplement: Supplementary file 1 [file 743655a20c64dc9a2b65d517.pdf]

## Supplementary information

Supplementary Table 1 Primer sequences used for RT-PCR

**Supplementary Figure 1. (a)** Quantitative PCR analysis of autophagy- and mitophagy-related genes in cardiac tissue from Control, HFpEF, and HFpEF+UA mice. **(b)** Immunoblot analysis of mTOR, AKT, AMPK $\alpha$ , and phospho-AMPK $\alpha$  in heart lysates;  $\beta$ -actin was used as a loading control. **(c)** Densitometric quantification of phospho-mTOR/mTOR, phospho-AKT/AKT, and phospho-AMPK $\alpha$ /AMPK $\alpha$  ratios. **(d)** Immunoblot analysis of autophagy initiation-related proteins, including Beclin1, ULK1, p70S6K;  $\beta$ -actin was used as a loading control. **(e)** Densitometric quantification of phospho-Beclin1/Beclin1, phospho-ULK1/ULK1, and phospho-p70S6K/p70S6K ratios. Data are presented as mean  $\pm$  SEM. Statistical significance was assessed as described in the Methods. \*P<0.05, \*\*P<0.01, \*\*\*P<0.001, \*\*\*\*P<0.0001.

**Supplementary Figure 2. Mitophagy flux and mitochondrial functional assessment in cardiomyocytes. (a)** Representative mt-Keima fluorescence images acquired at 445 nm (neutral pH) and 561 nm (acidic pH) from Control, HFpEF, HFpEF+UA, and CCCP-treated positive-control cardiomyocytes. **(b)** Quantification of mt-Keima red/green (561/445 nm) fluorescence ratios. **(c)** Seahorse XF analysis of oxygen consumption rate (OCR) and extracellular acidification rate (ECAR) during mitochondrial stress testing in cardiomyocytes. **(d)** Immunoblot analysis of LC3 A/B and p62/SQSTM1 in cardiomyocytes treated with or without bafilomycin A1 (BafA1);  $\beta$ -actin was used as a loading control. **(e)** Densitometric quantification of p62/ $\beta$ -actin and LC3-II/ $\beta$ -actin ratios in the presence or absence of BafA1. Data are presented as mean  $\pm$  SEM. Statistical significance was assessed as described in the Methods. \*P<0.05, \*\*P<0.01, \*\*\*P<0.001.

**Supplementary Figure 3. Gut microbiome composition and lipidomic features associated with HFpEF and UA treatment.** (a) Bray–Curtis dissimilarity analysis comparing fecal microbial community composition among Control, HFpEF, and HFpEF+UA groups. (b) Firmicutes/Bacteroidetes (F/B) ratio calculated from metagenomic profiles. (c) Relative abundance of selected ceramide-producing bacterial genera across experimental groups, shown from left to right as Bacteroides, Parabacteroides, Phocaeicola, and Alistipes. (d) Z-score heatmap of selected lipidomic species across Control, HFpEF, and HFpEF+UA groups. Data are presented as mean  $\pm$  SEM. Statistical significance as assessed as described in the Methods. \*P<0.05, \*\*P<0.01, \*\*\*P<0.001.

**Supplementary Figure 4. Fibrosis-associated transcriptional programs and cardiomyocyte state dynamics.** (a) ForceAtlas2 (FA1–FA2) embedding of cardiomyocyte nuclei visualizing the mean Z-score expression of a fibrosis-associated gene panel along inferred transcriptional trajectories. (b) Relative composition of major cardiomyocyte transcriptional modules across Control, HFpEF, and HFpEF+UA groups. (c) Heatmap of significantly altered fibrosis-related genes within fibroblast-enriched transcriptional states, showing per-cell scaled expression across Control, HFpEF, and HFpEF+UA cardiomyocytes. (d) Pseudotime dynamics of the fibrosis gene module, displayed as mean Z-score panel scores across Early, Mid, and Late pseudotime phases in Control, HFpEF, and HFpEF+UA cardiomyocytes.

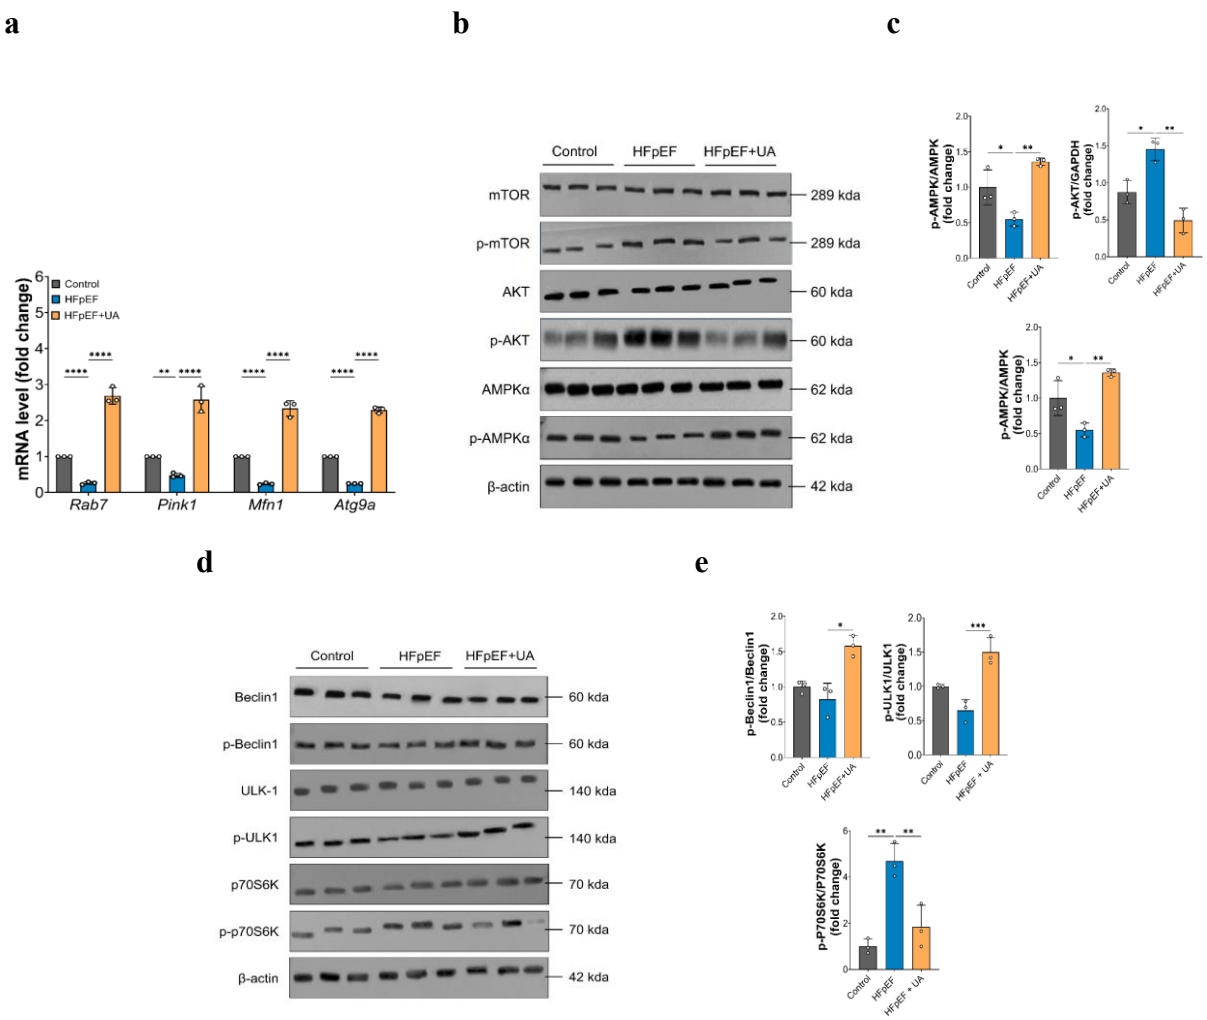

**Supplementary Fig. 1**

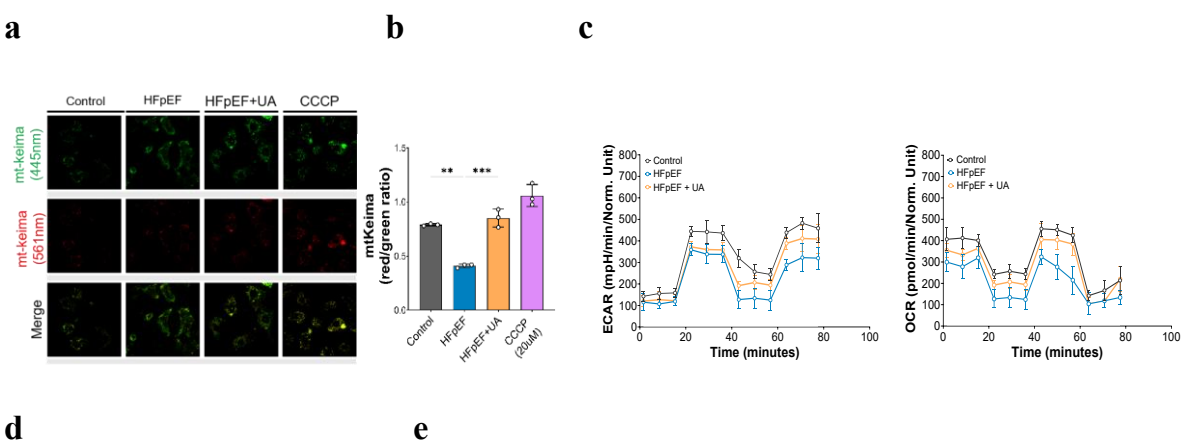

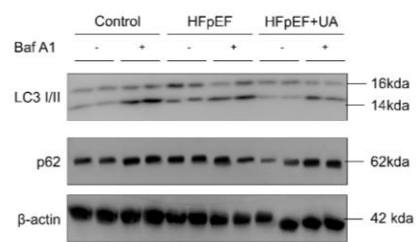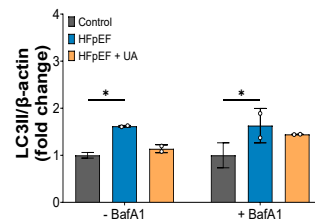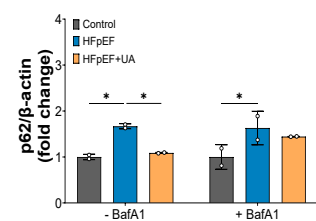

**Supplementary Fig. 2**

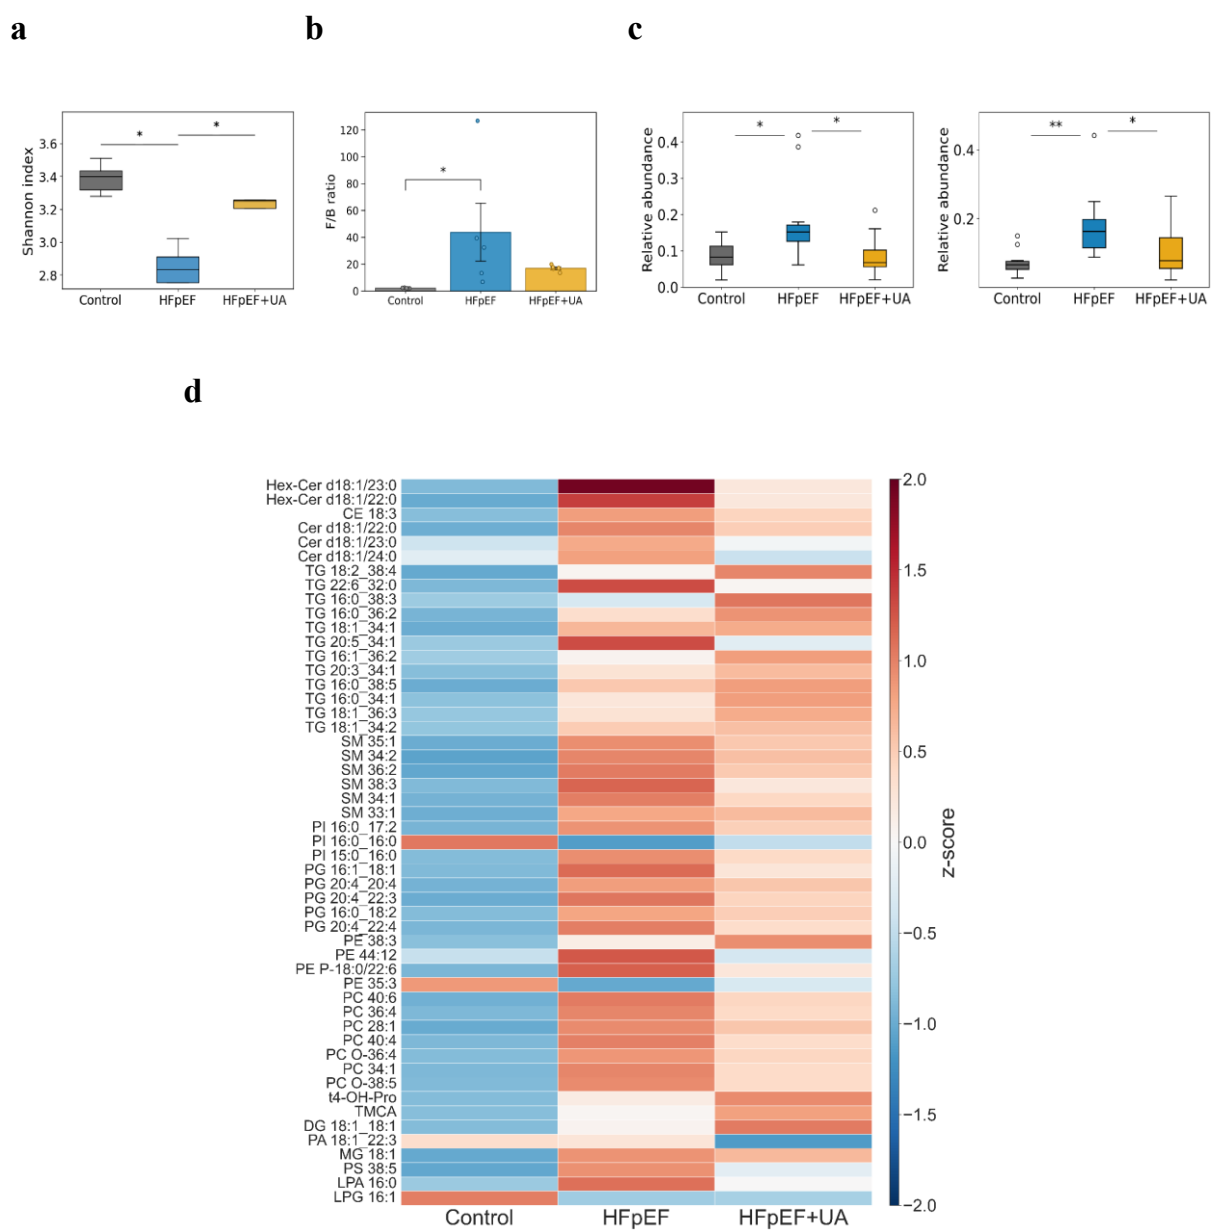

Supplementary Fig. 3

a

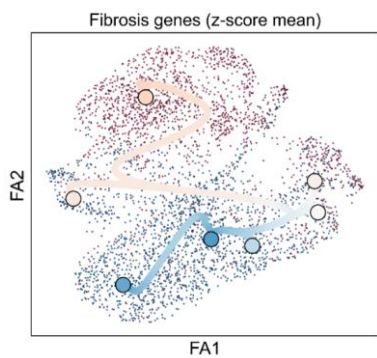

b

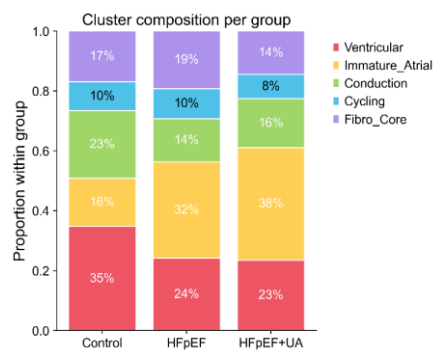

c

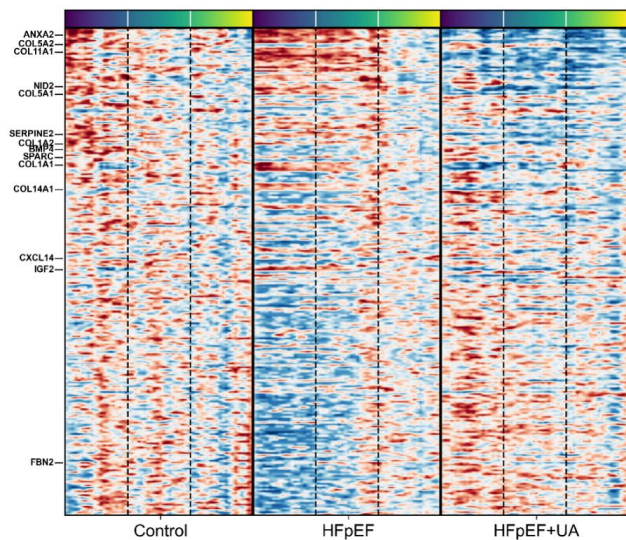

Supplementary Fig.4
