# Supplementary material for: Urolithin A Restores Mitochondrial Function and Reverses Cardiac Remodeling in HFpEF
Source: Research Square preprint supplement (doi:10.21203/rs.3.rs-8585859/v1), 2026-02-05
Supplement: Supplementary file 1 [file 777671661223ad2182f8c456.xlsx]

## Sheet: Table S1
Gene	Species		Sequences (5’ → 3’)
Tgf beta-1	Mouse	Forward	CCTGTCCAAACTAAGGC
	Mouse	Reverse	GGTTTTCTCATAGATGGCG
Col1a1	Mouse	Forward	GAGCGGAGAGTACTGGATCG
	Mouse	Reverse	GCTTCTTTTCCTTGGGGTTC
Ctgf	Mouse	Forward	CAAAGCAGCTGCAAATACCA
	Mouse	Reverse	GGCCAAATGTGTCTTCCAGT
Myh7	Mouse	Forward	CACCGCTCACCTTCACCCG
	Mouse	Reverse	TTCCACCTAAAGGGCTGTTG
Bnp	Mouse	Forward	TCCATCAGAGGGGTCACAC
	Mouse	Reverse	GCCTTGTGAAGGGGTGATTA
Scd1	Mouse	Forward	CCTGTACGCTGGTGCTGAAT
	Mouse	Reverse	CACGTTGGGTCGATGAAGAA
Rab7	Mouse	Forward	ACTGCCCCCAACACTTTCAA
	Mouse	Reverse	CTTGGCACTGGTCTCGAAGT
Pink1	Mouse	Forward	CACACTGTTCCTCGTTATGAAGA
	Mouse	Reverse	CTTGAGATCCCGATGGGCAAT
Mfn1	Mouse	Forward	ATCACTGCAATCTTCGGCCA
	Mouse	Reverse	AGCAGTTGGTTGTGTGACCA
Atg9a	Mouse	Forward	CGCTGTGGACAAAGTGATGA
	Mouse	Reverse	GCTGGTAGATGGTGTTGAGG
IL6	Human	Forward	AGTAGTGAGGAACAAGCCAGAG
	Human	Reverse	TACATTTGCCGAAGAGCC
IL8	Human	Forward	GAGAGTGATTGAGAGTGGACCAC
	Human	Reverse	CACAACCCTCTGCACCCAGTTT
IL1B	Human	Forward	CCACAGACCTTCCAGGAGAATG
	Human	Reverse	GTGCAGTTCAGTGATCGTACAGG
TGFB1	Human	Forward	TCGACATGGAGCTGGTGAAG
	Human	Reverse	GGTTTCCACCATTAGCACGC
COL1A1	Human	Forward	GAGGGCCAAGACGAAGACATC
	Human	Reverse	CAGATCACGTCATCGCACAAC
CTGF	Human	Forward	CAAGGGCCTCTTCTGTGACT
	Human	Reverse	CCGTCGGTACATACTCCACA
BNP	Human	Forward	TCAGCCTCGGACTTGGAAAC
	Human	Reverse	CTTCCAGACACCTGTGGGAC
ANP	Human	Forward	GAACCAGAGGGGAGAGACAGAG
	Human	Reverse	CCCTCAGCTTGCTTTTTAGGAG
MYH6	Human	Forward	GGAAGACAAGGTCAACAGCCTG
	Human	Reverse	TCCAGTTTCCGCTTTGCTCGCT
MYH7	Human	Forward	AGACTGTCGTGGGCTTGTATCAG
	Human	Reverse	GCCTTTGCCCTTCTCAATAGG
